# Supplementary material
Source: PubMed Central journal article supplement (PMC6062851)

**A**

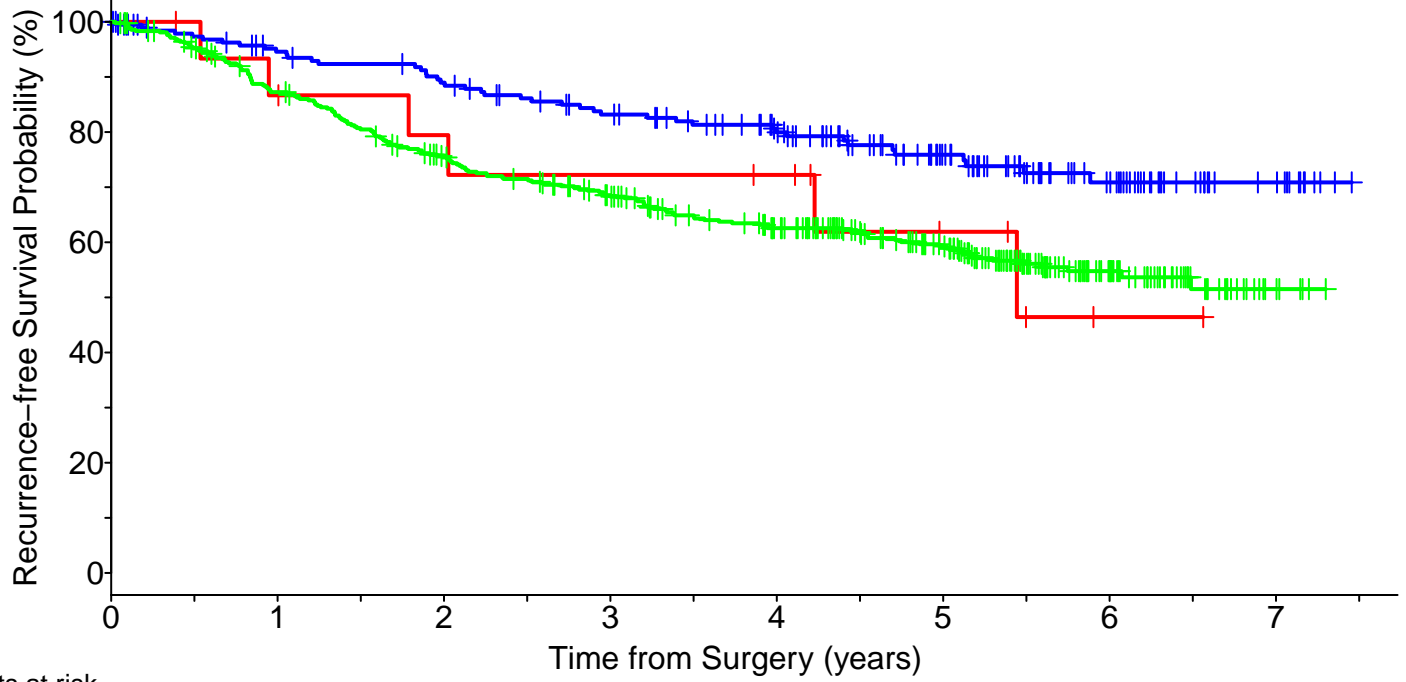

Patients at risk

|        |     |     |     |     |     |     |    |    |
|--------|-----|-----|-----|-----|-----|-----|----|----|
| — ALK  | 16  | 13  | 11  | 10  | 9   | 5   | 1  | 0  |
| — EGFR | 194 | 170 | 158 | 140 | 117 | 76  | 41 | 12 |
| — KRAS | 421 | 351 | 291 | 251 | 207 | 149 | 59 | 6  |

**B**

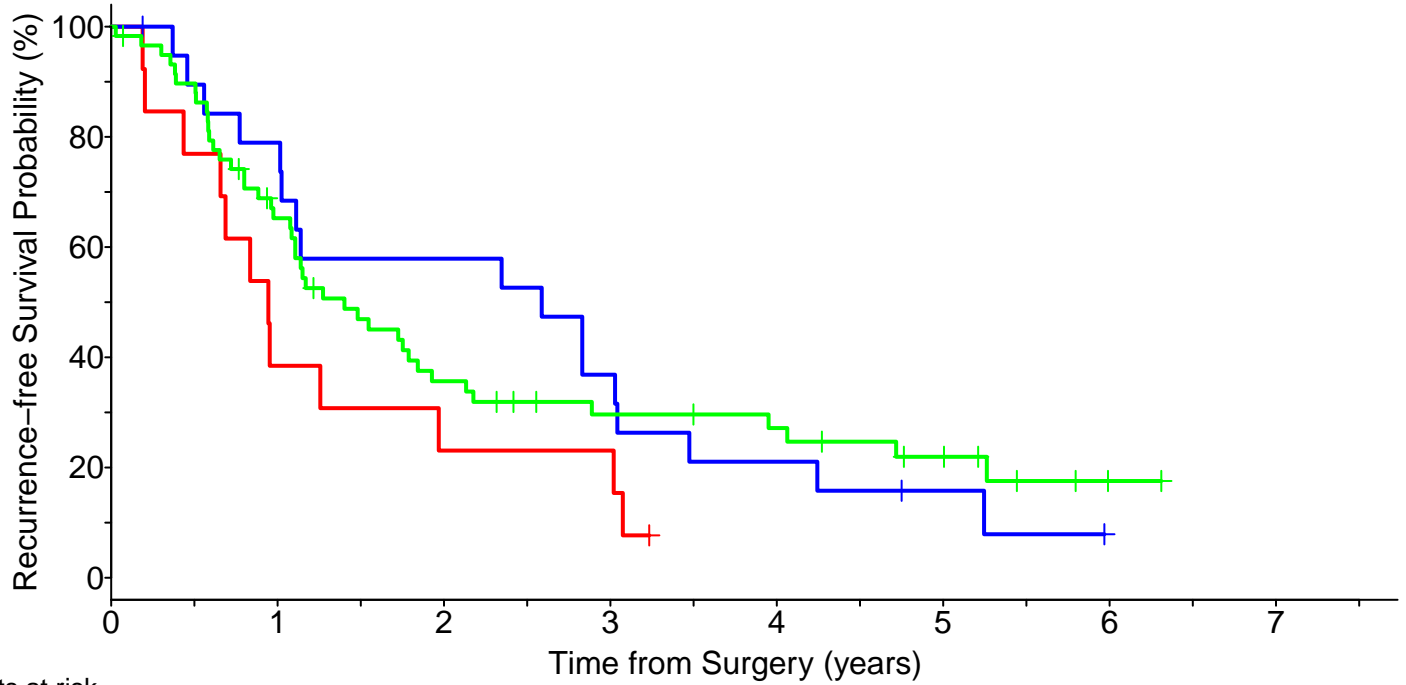

Patients at risk

|        |    |    |    |    |    |   |   |
|--------|----|----|----|----|----|---|---|
| — ALK  | 13 | 5  | 3  | 3  | 0  | 0 | 0 |
| — EGFR | 20 | 15 | 11 | 7  | 4  | 2 | 0 |
| — KRAS | 59 | 36 | 19 | 13 | 11 | 7 | 1 |

Supplement: NIHMS974592-supplement-1.pdf [file NIHMS974592-supplement-1.pdf]

**A**

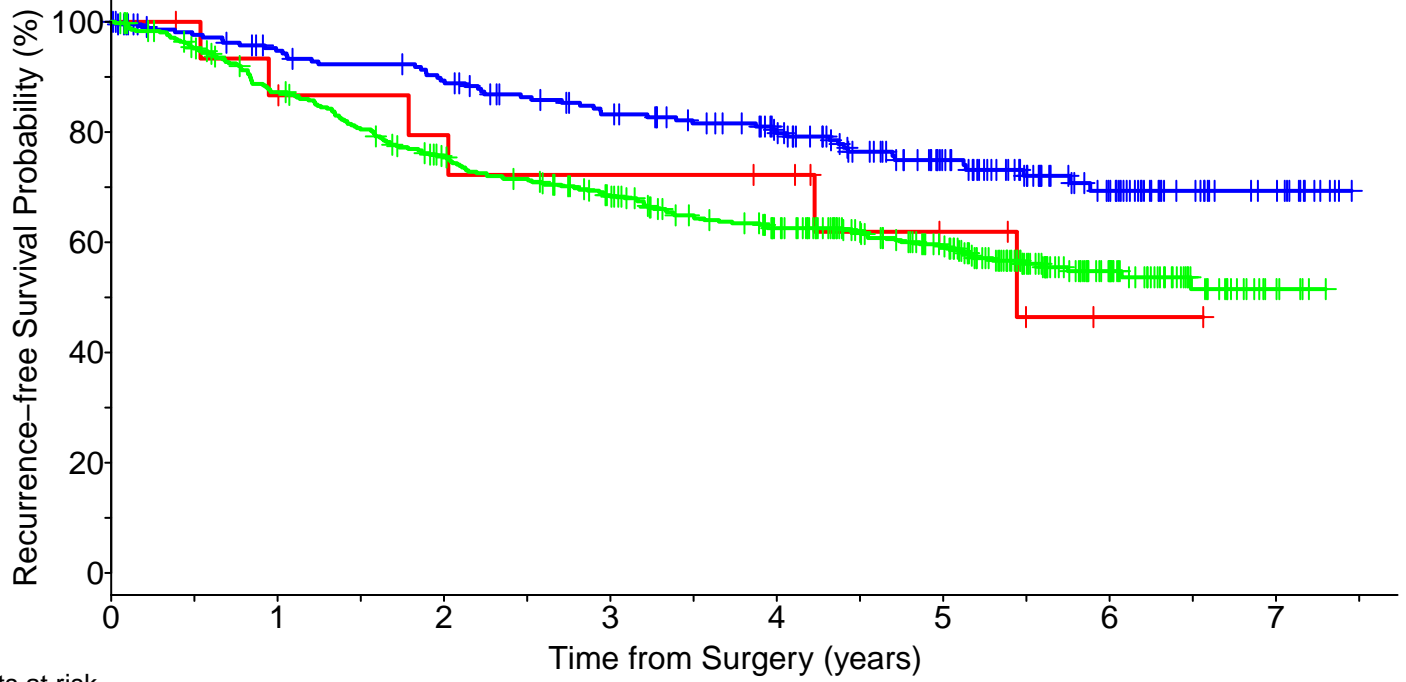

Patients at risk

|        |     |     |     |     |     |     |    |    |
|--------|-----|-----|-----|-----|-----|-----|----|----|
| — ALK  | 16  | 13  | 11  | 10  | 9   | 5   | 1  | 0  |
| — EGFR | 219 | 194 | 181 | 159 | 133 | 87  | 46 | 14 |
| — KRAS | 421 | 351 | 291 | 251 | 207 | 149 | 59 | 6  |

**B**

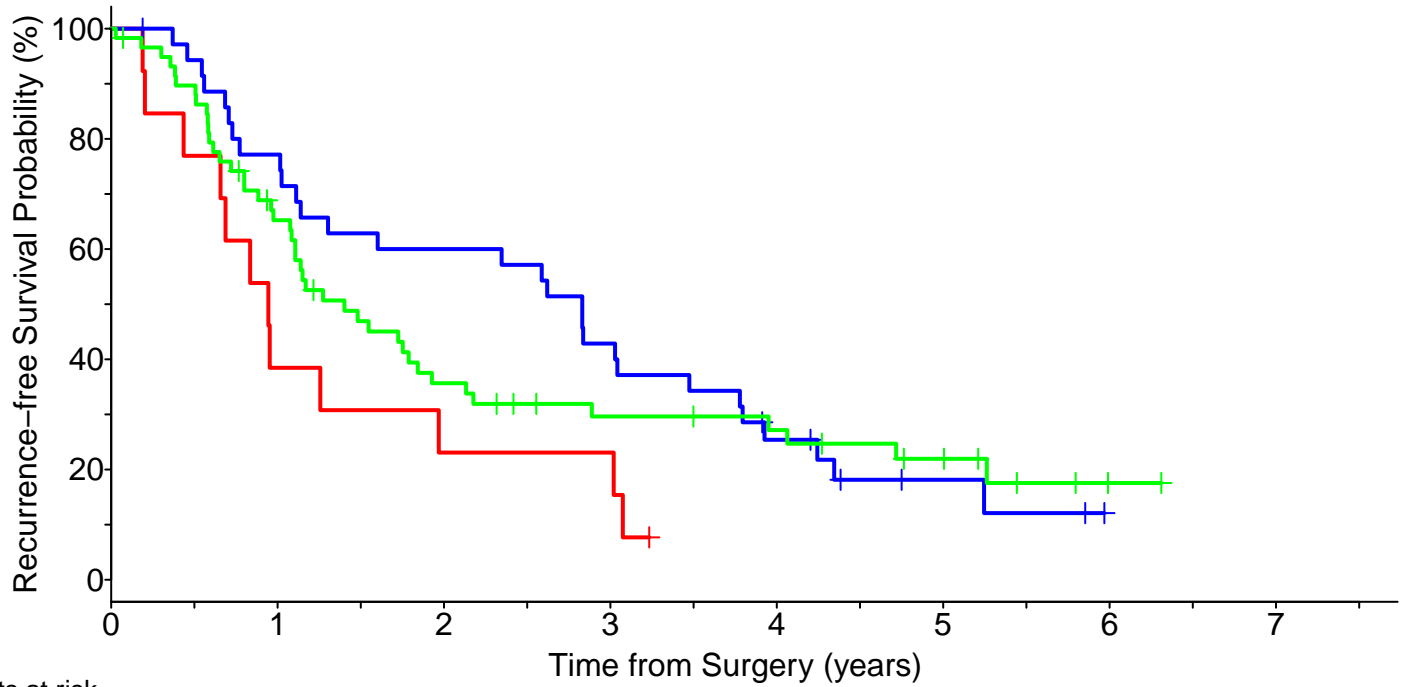

Patients at risk

|        |    |    |    |    |    |   |   |
|--------|----|----|----|----|----|---|---|
| — ALK  | 13 | 5  | 3  | 3  | 0  | 0 | 0 |
| — EGFR | 36 | 27 | 21 | 15 | 8  | 3 | 0 |
| — KRAS | 59 | 36 | 19 | 13 | 11 | 7 | 1 |

Supplement: NIHMS974592-supplement-2.pdf [file NIHMS974592-supplement-2.pdf]

**A**

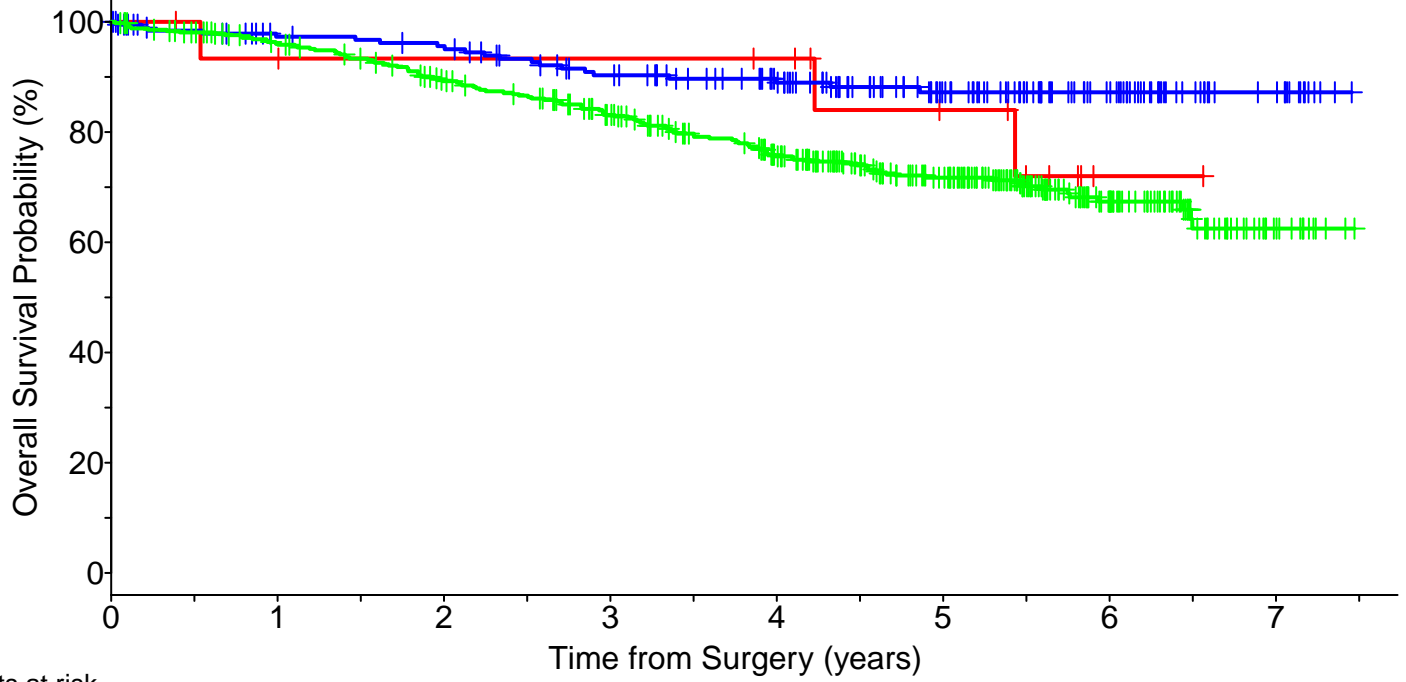

Patients at risk

|        |     |     |     |     |     |     |    |    |
|--------|-----|-----|-----|-----|-----|-----|----|----|
| — ALK  | 16  | 14  | 13  | 13  | 12  | 8   | 1  | 0  |
| — EGFR | 194 | 173 | 168 | 149 | 127 | 84  | 47 | 14 |
| — KRAS | 421 | 385 | 343 | 302 | 248 | 179 | 79 | 12 |

**B**

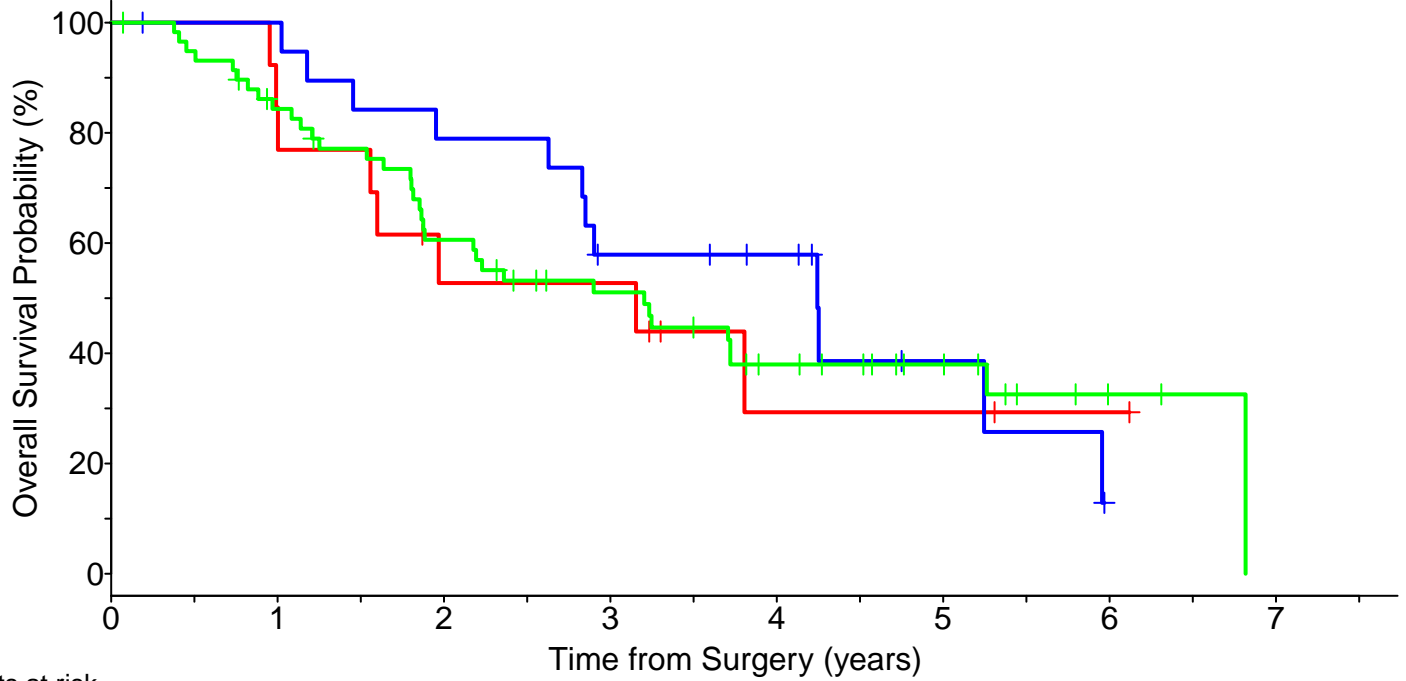

Patients at risk

|        |    |    |    |    |    |   |    |    |
|--------|----|----|----|----|----|---|----|----|
| — ALK  | 13 | 11 | 6  | 6  | 2  | 2 | 1  | 0  |
| — EGFR | 20 | 19 | 15 | 10 | 8  | 3 | 20 | 19 |
| — KRAS | 59 | 47 | 33 | 24 | 15 | 9 | 2  | 0  |

Supplement: NIHMS974592-supplement-3.pdf [file NIHMS974592-supplement-3.pdf]

**A**

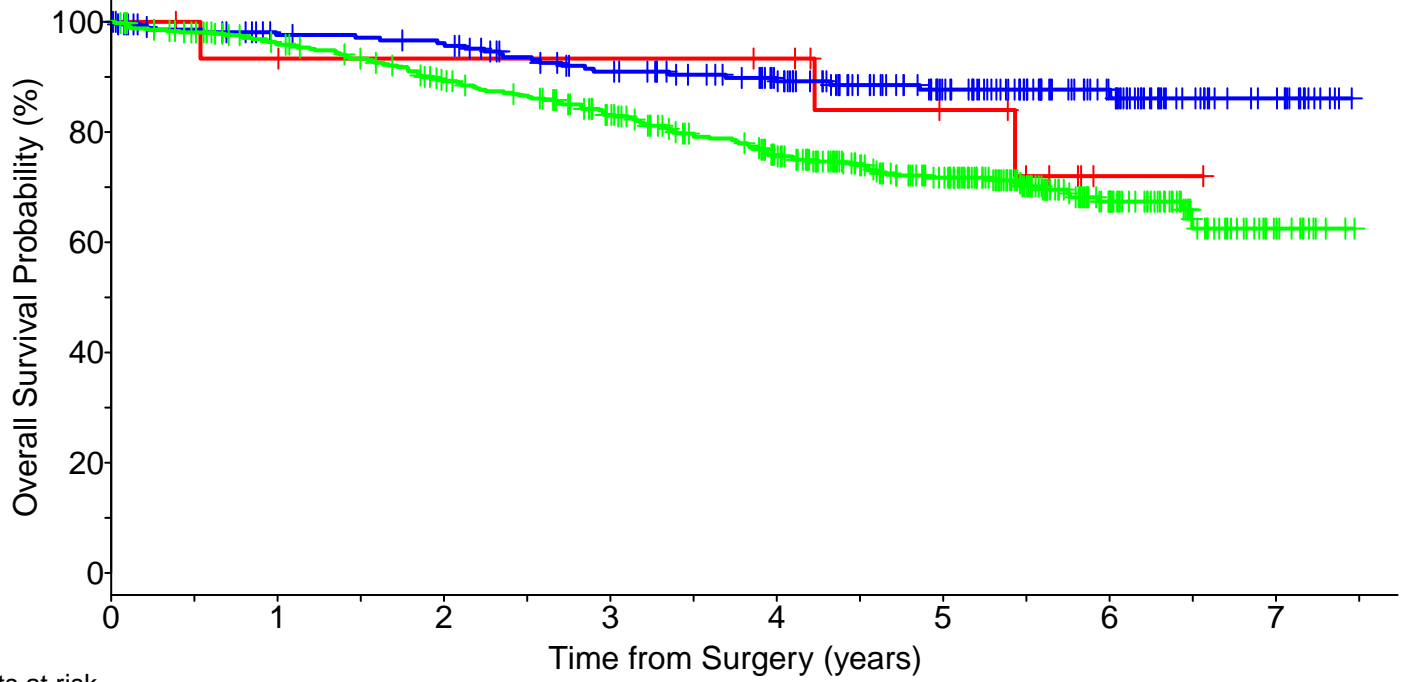

Patients at risk

|        |     |     |     |     |     |     |    |    |
|--------|-----|-----|-----|-----|-----|-----|----|----|
| — ALK  | 16  | 14  | 13  | 13  | 12  | 8   | 1  | 0  |
| — EGFR | 219 | 198 | 193 | 171 | 146 | 98  | 55 | 16 |
| — KRAS | 421 | 385 | 343 | 302 | 248 | 179 | 79 | 12 |

**B**

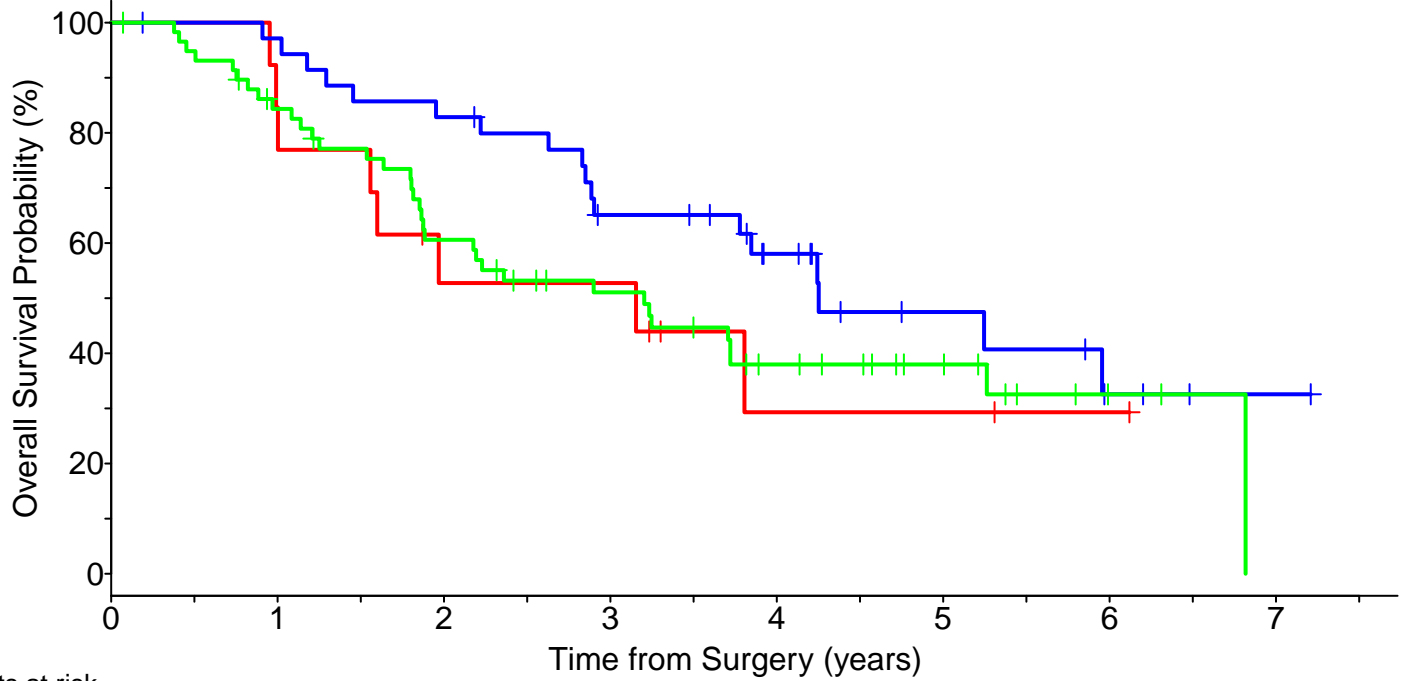

Patients at risk

|        |    |    |    |    |    |   |   |   |
|--------|----|----|----|----|----|---|---|---|
| — ALK  | 13 | 11 | 6  | 6  | 2  | 2 | 1 | 0 |
| — EGFR | 36 | 34 | 29 | 21 | 14 | 7 | 3 | 1 |
| — KRAS | 59 | 47 | 33 | 24 | 15 | 9 | 2 | 0 |

Supplement: NIHMS974592-supplement-4.pdf [file NIHMS974592-supplement-4.pdf]
